# Supplementary material for: m6A promotes planarian regeneration
Source: PubMed Central journal article supplement (PMC10212710; doi:10.1111/cpr.13481), 2023-04-21

Fig. S1

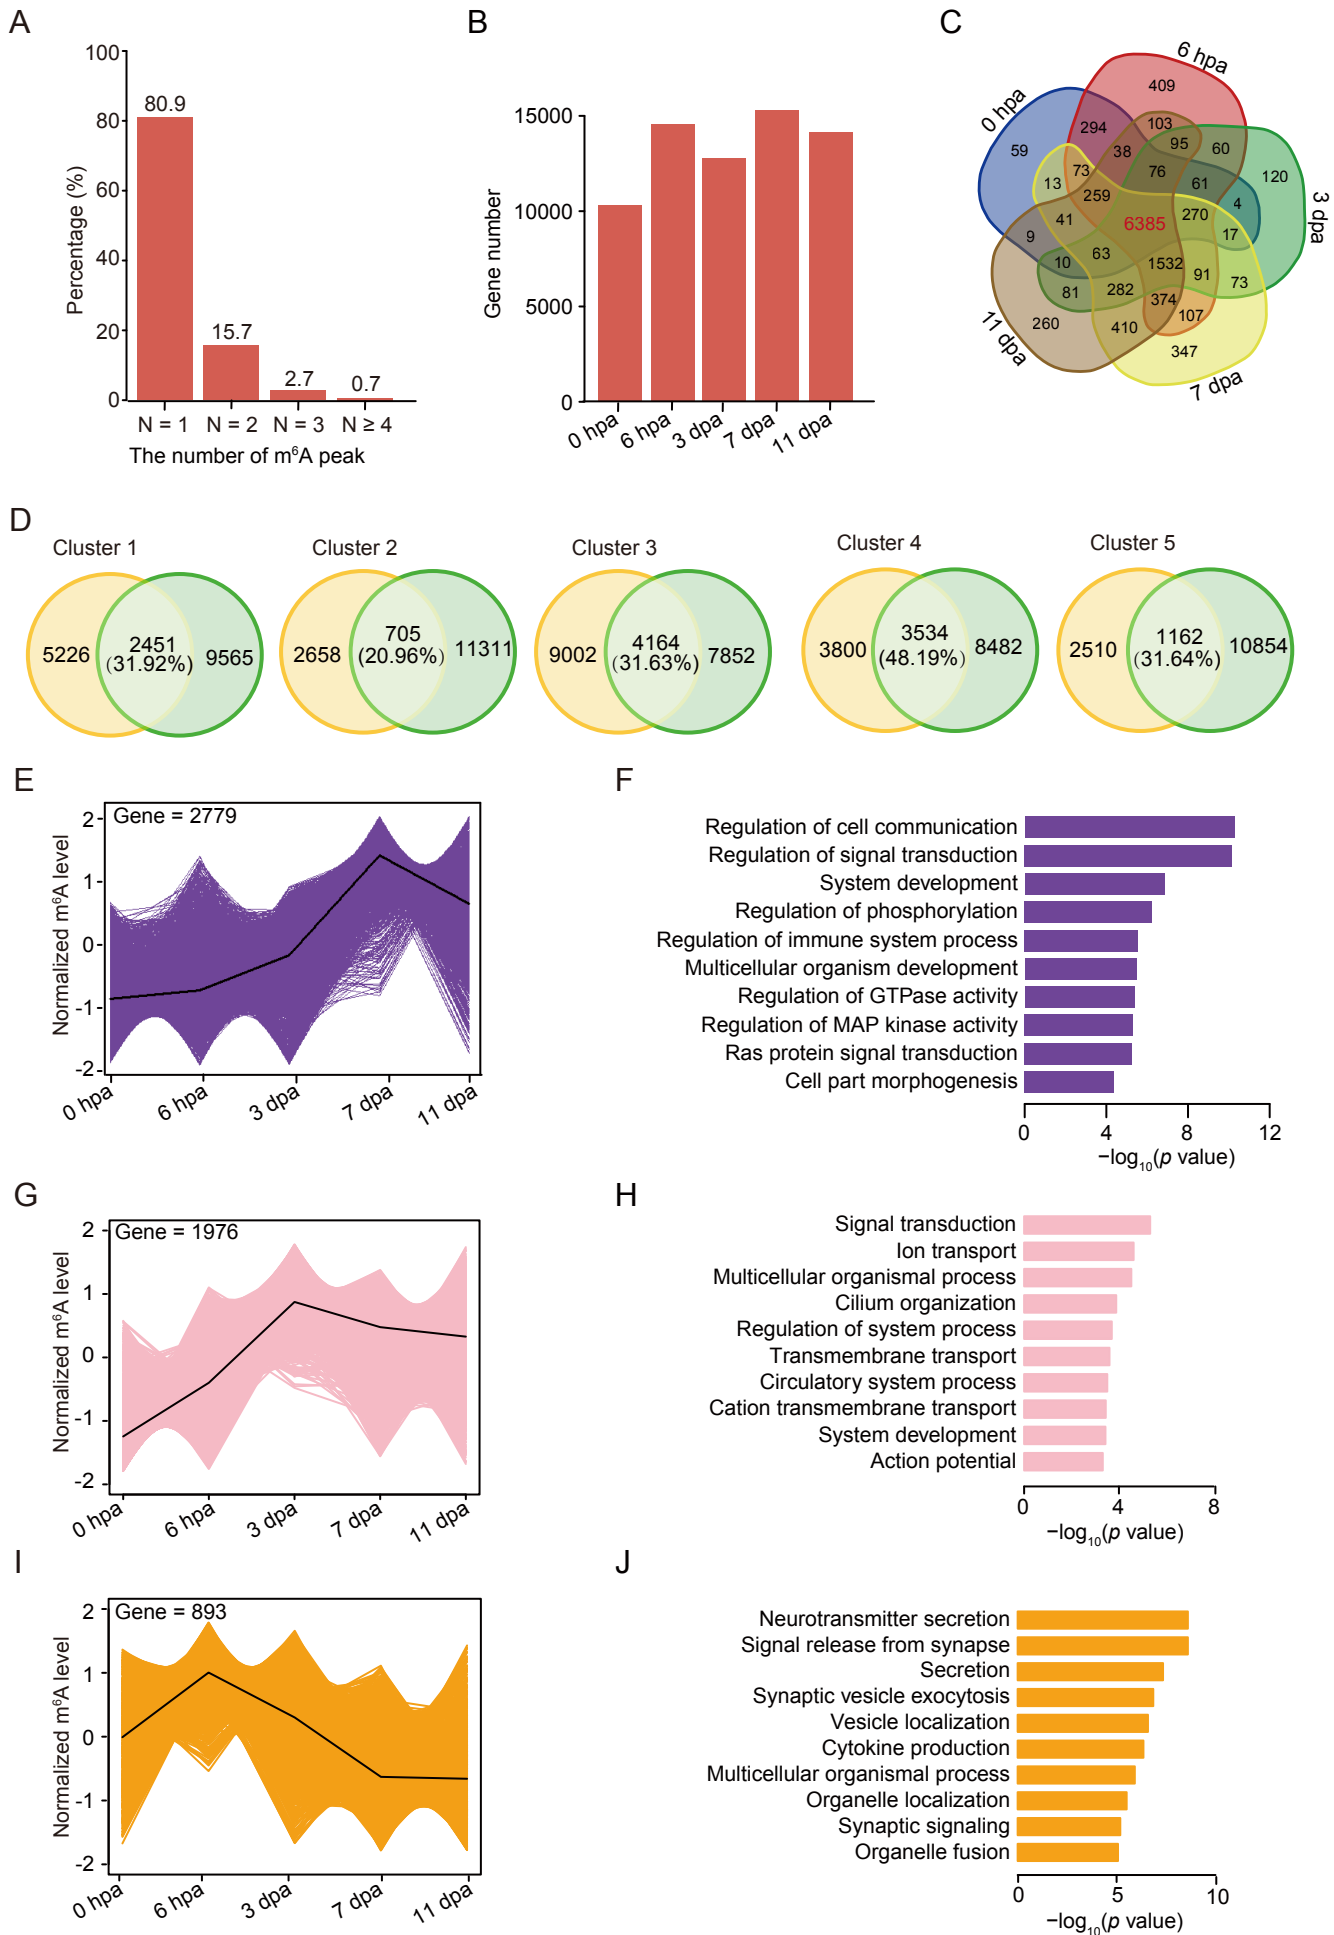

Fig. S2

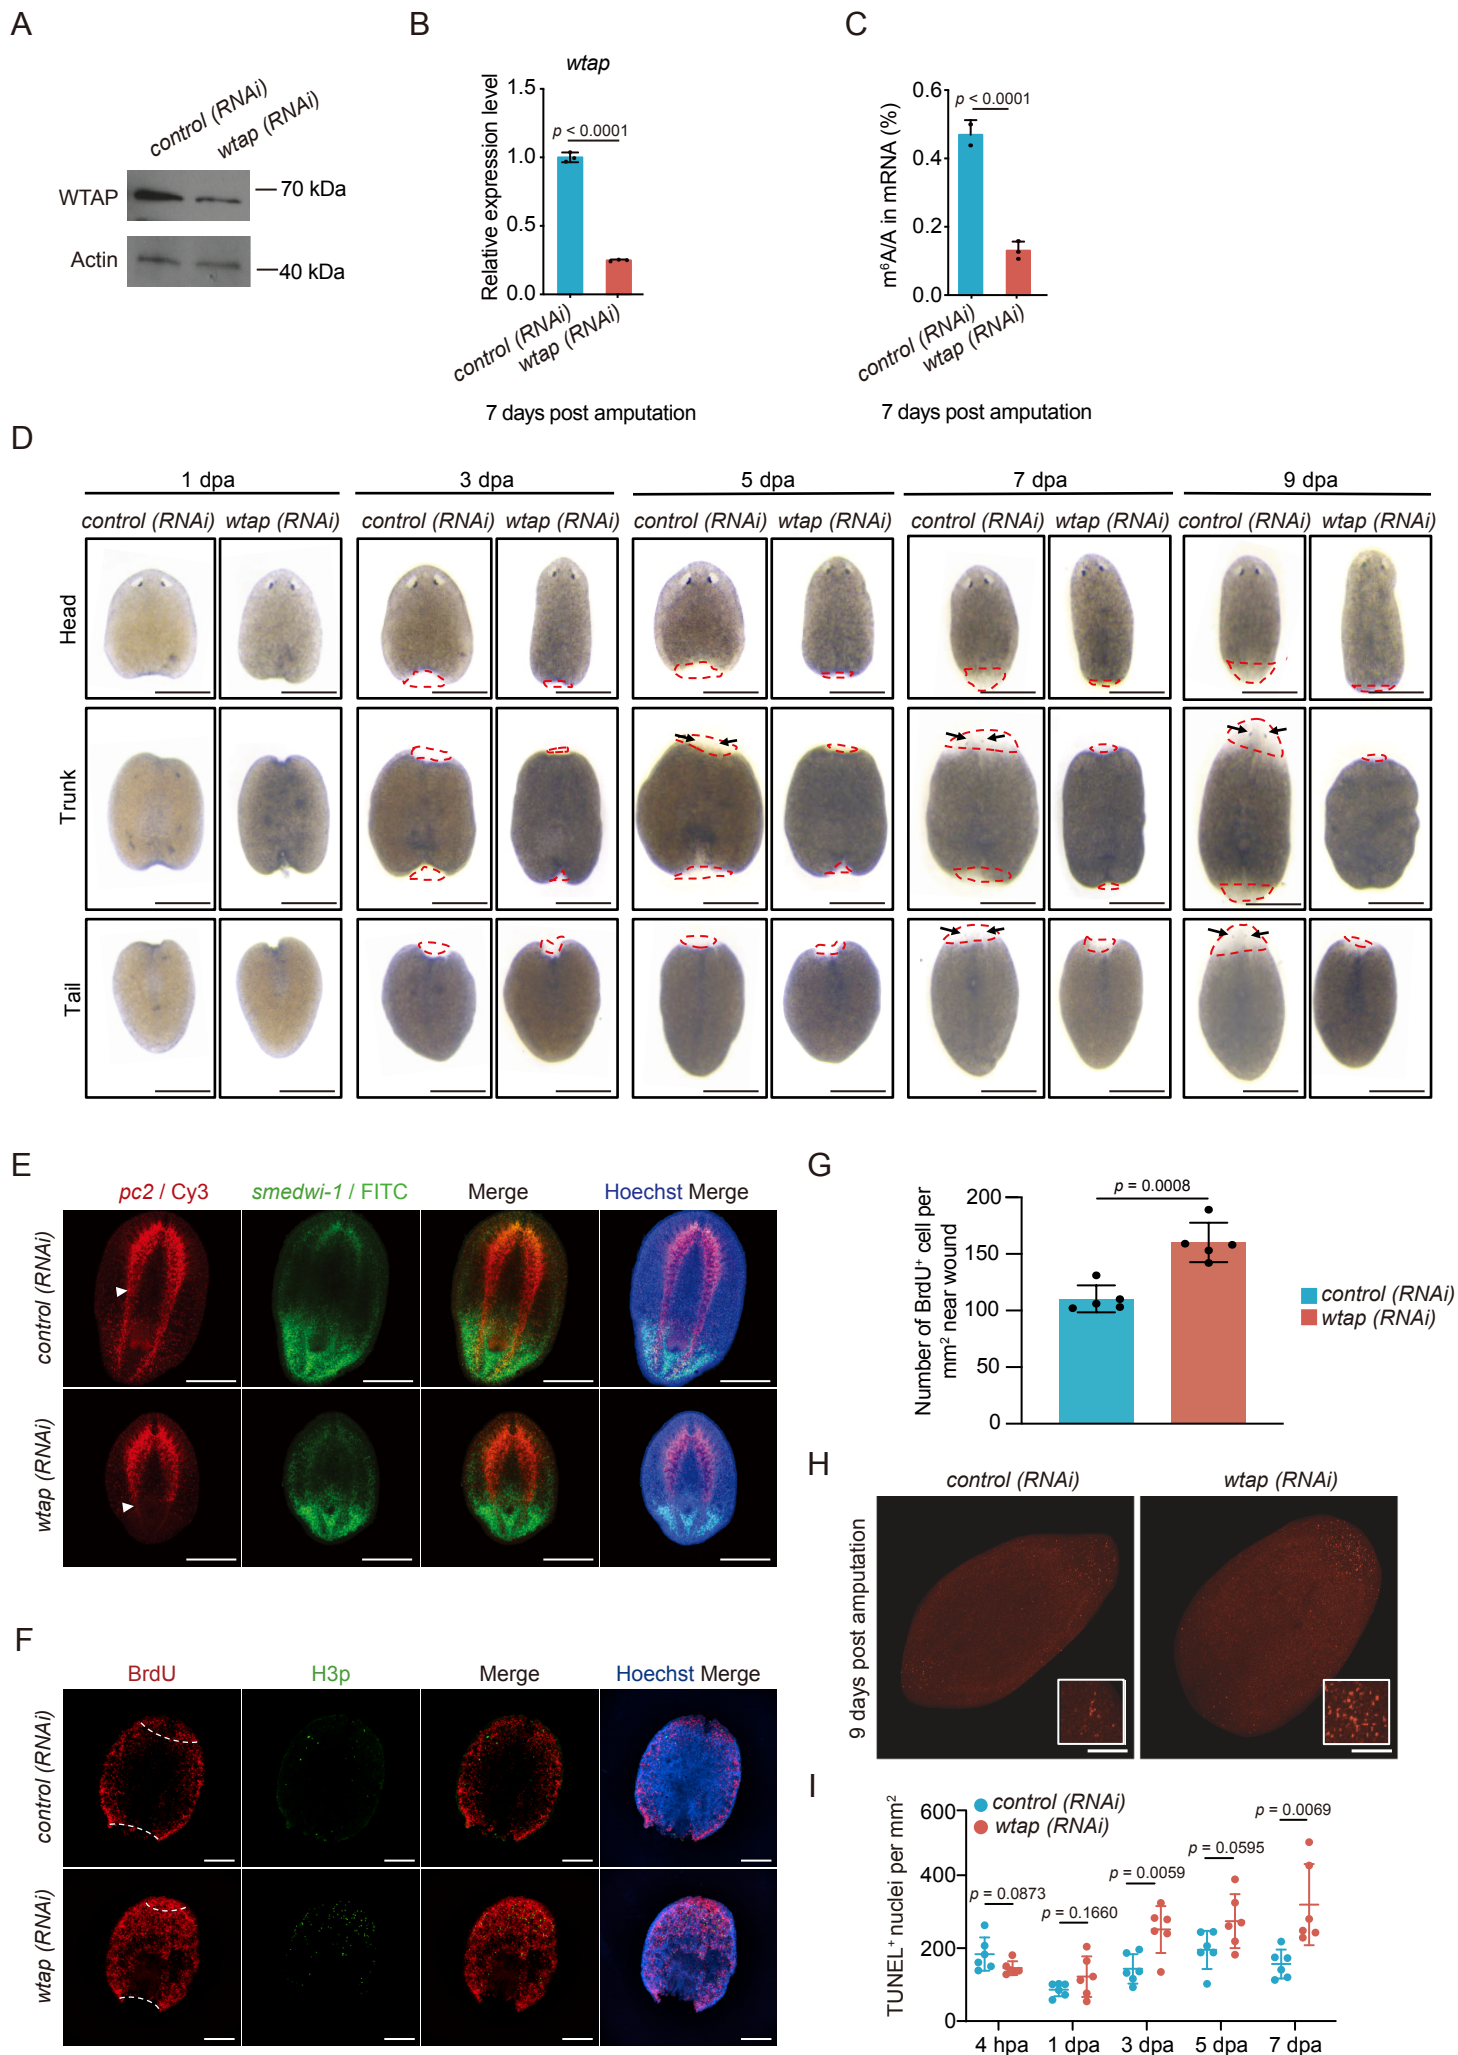

Fig. S3

A

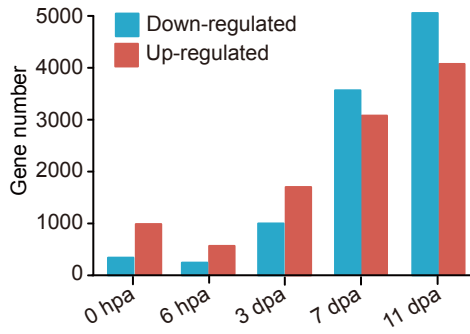

B

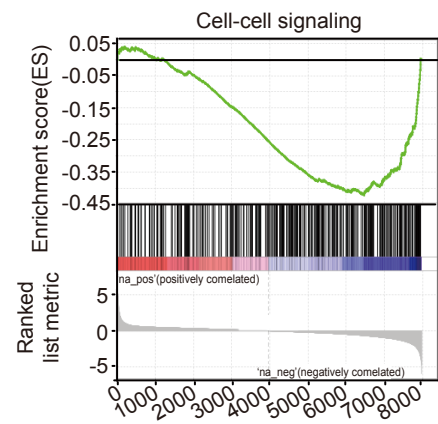

C

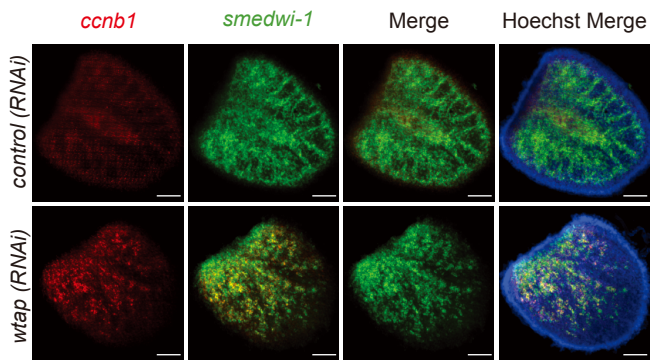

D

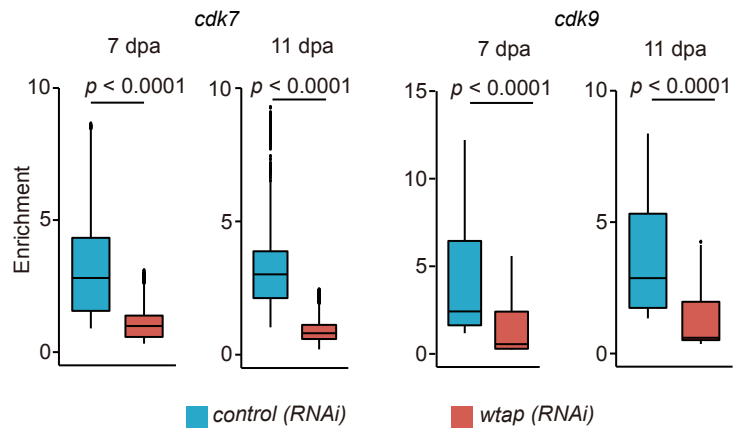

E

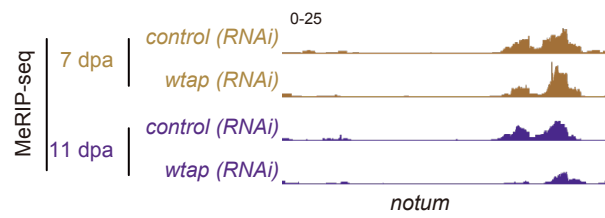

F

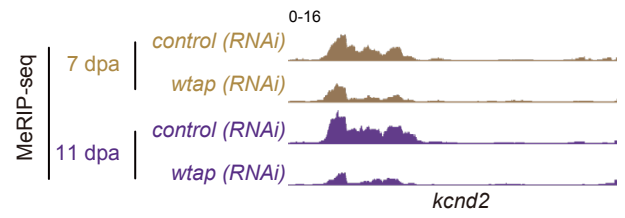

G

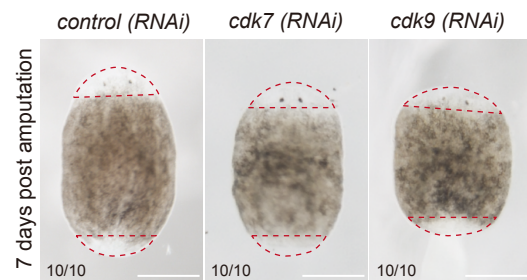

Fig. S4

A

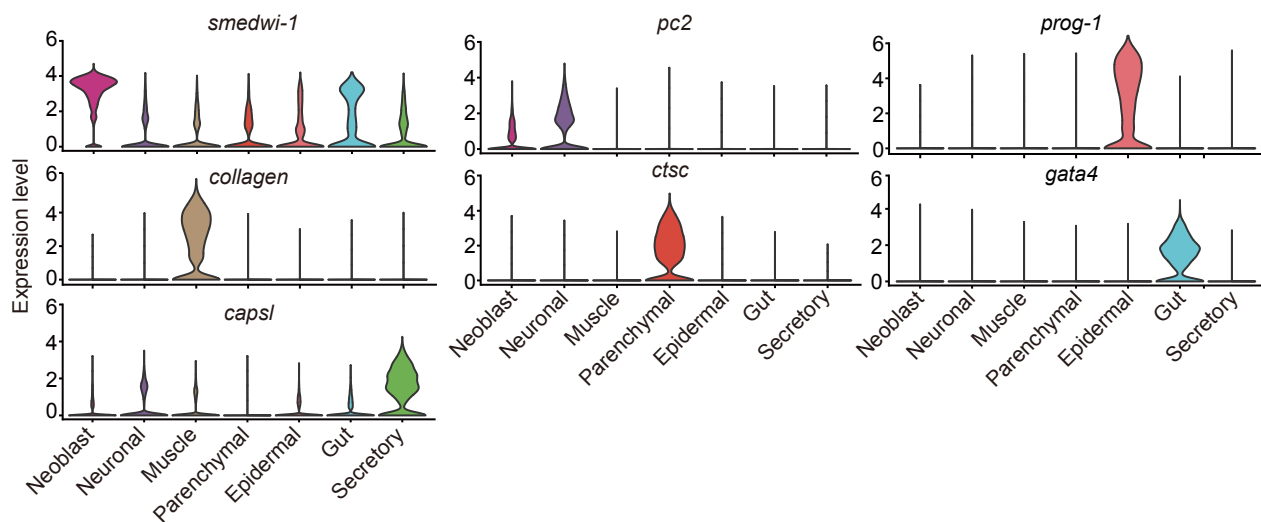

B

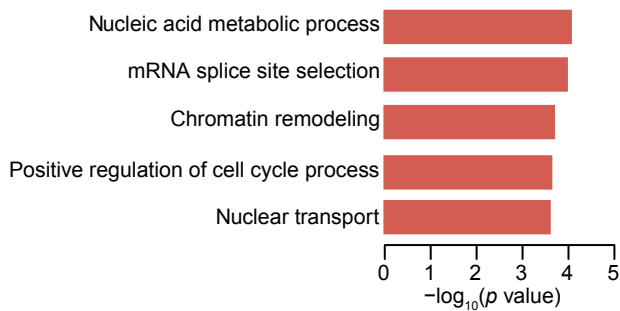

C

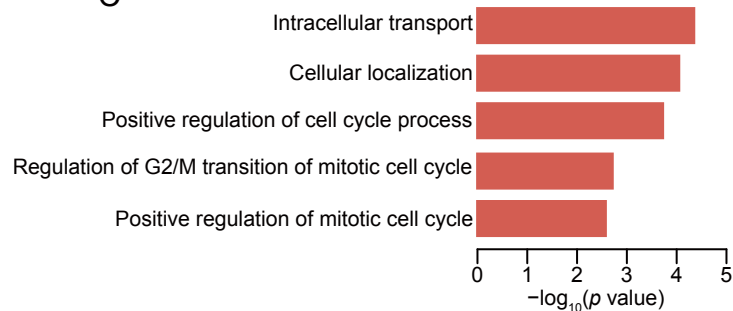

D

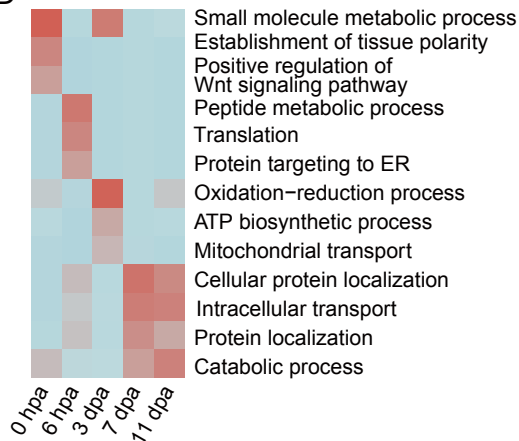

E

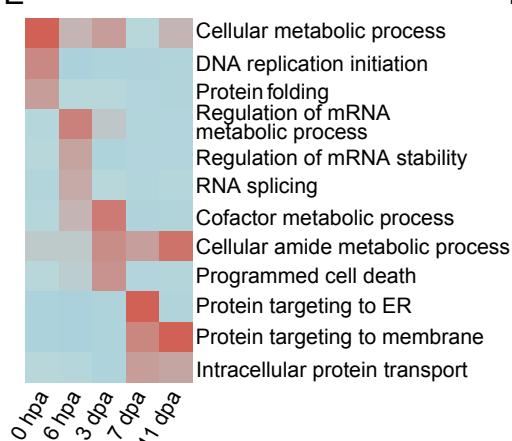

F

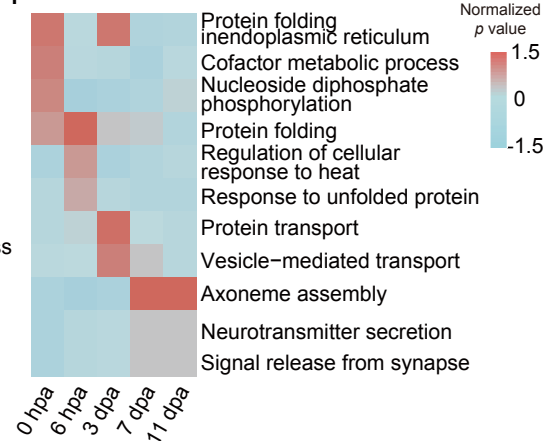

Fig. S5

A

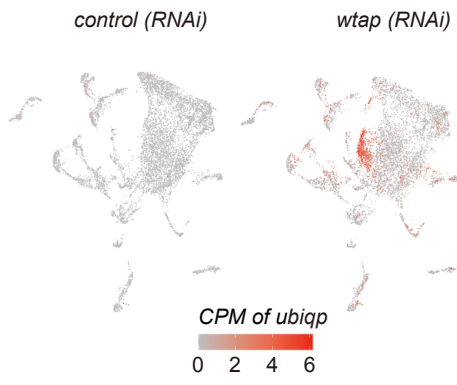

B

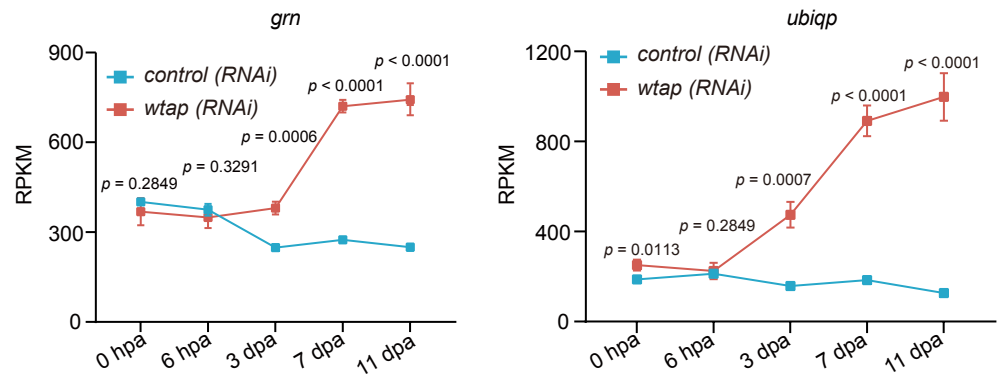

C

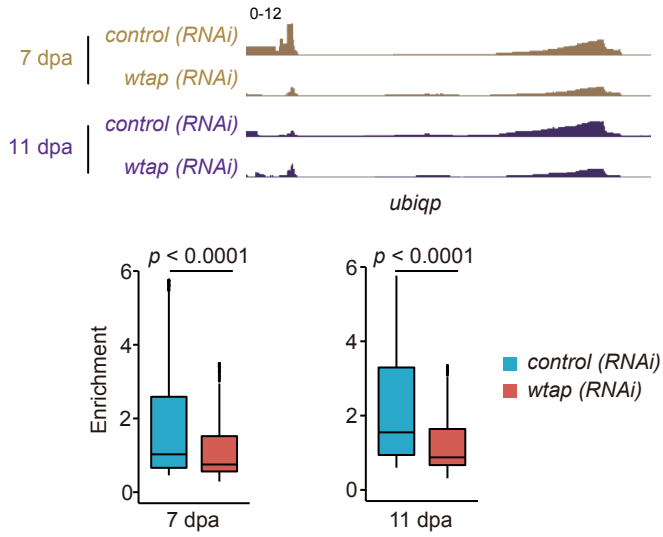

D

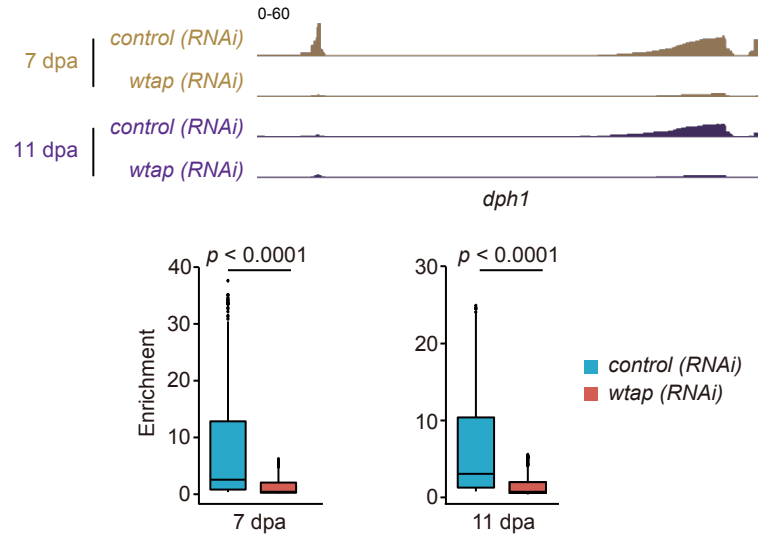

E

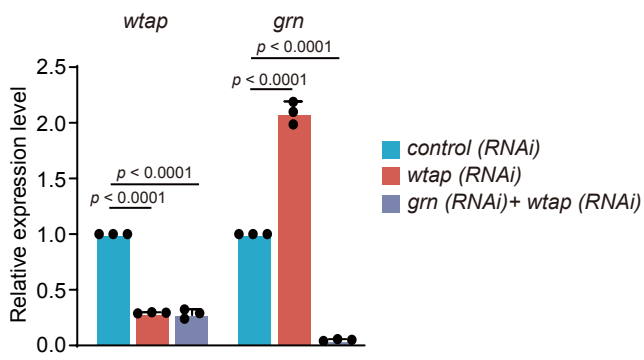

f

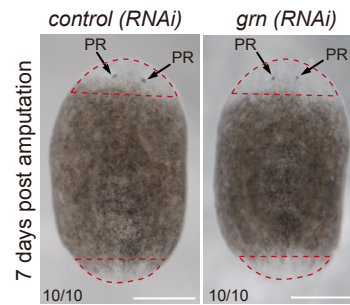

Fig. S6

A

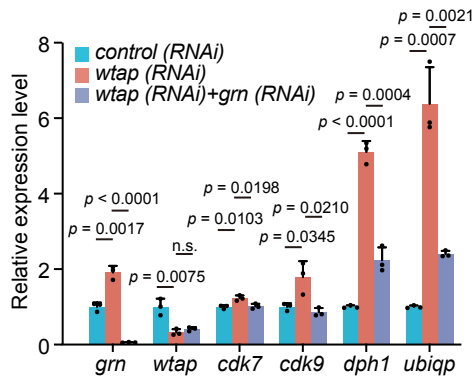

B

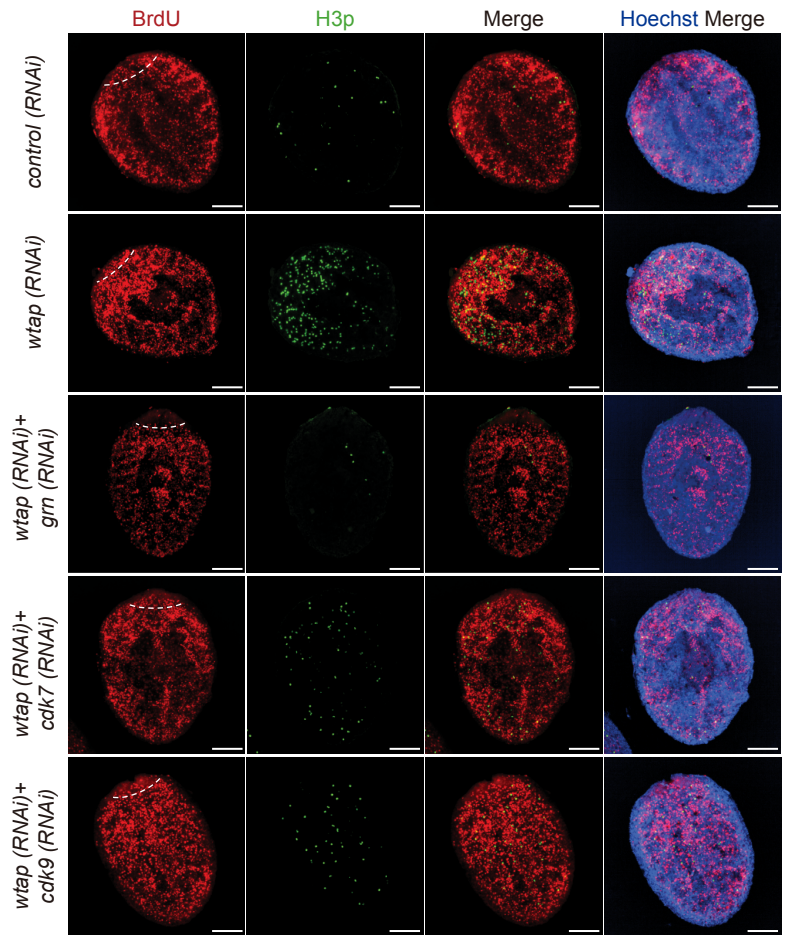

C

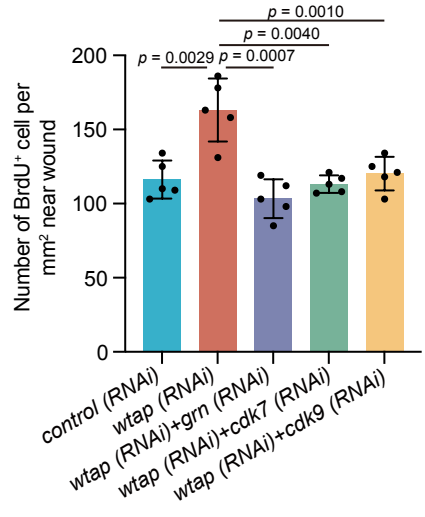

D

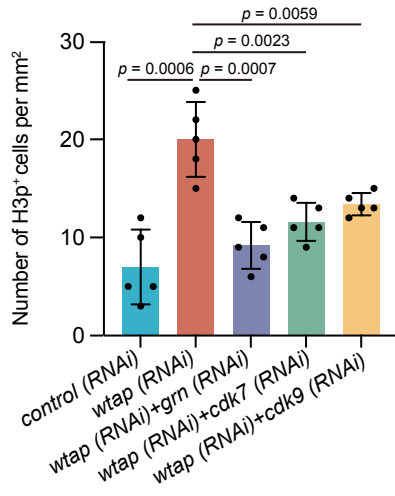

Fig. S7

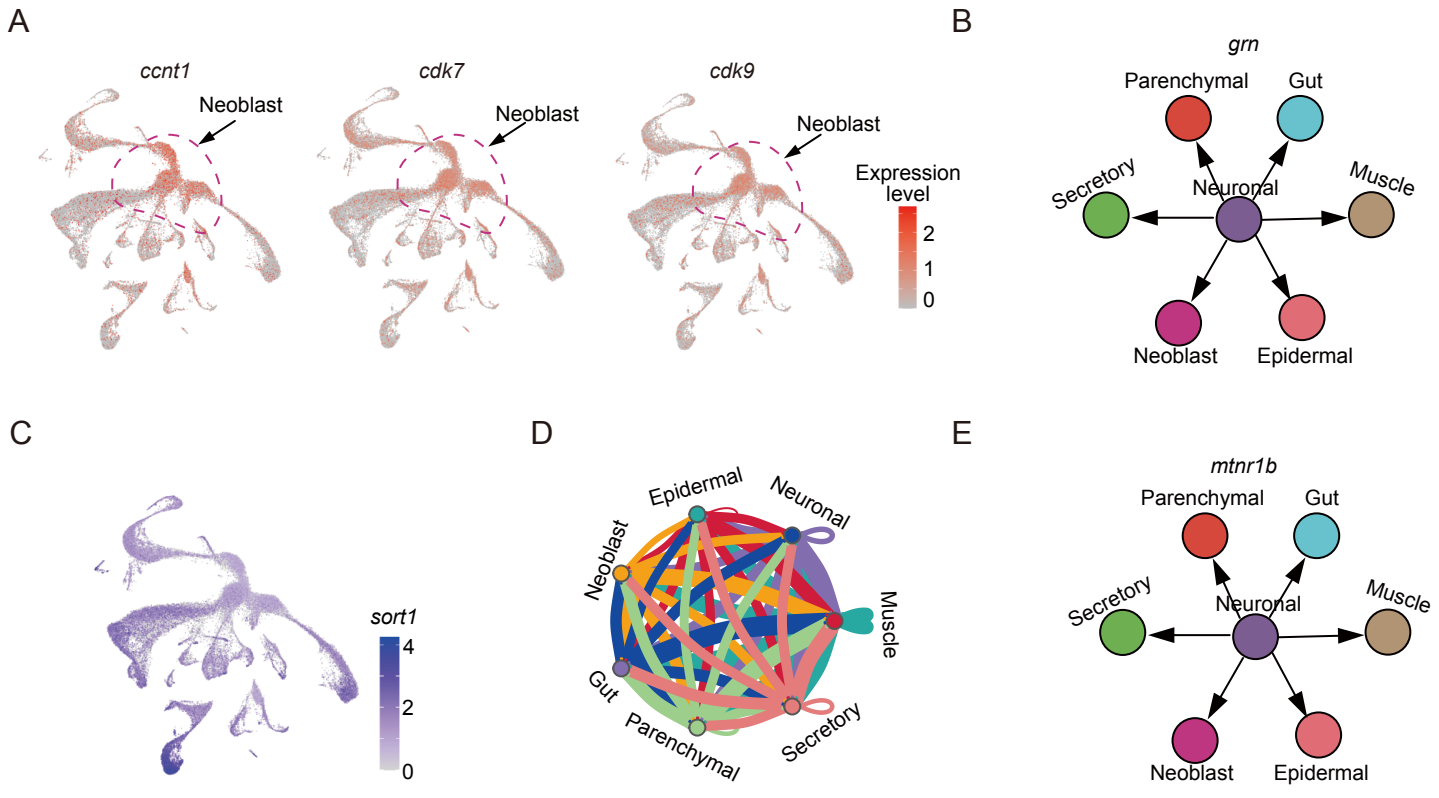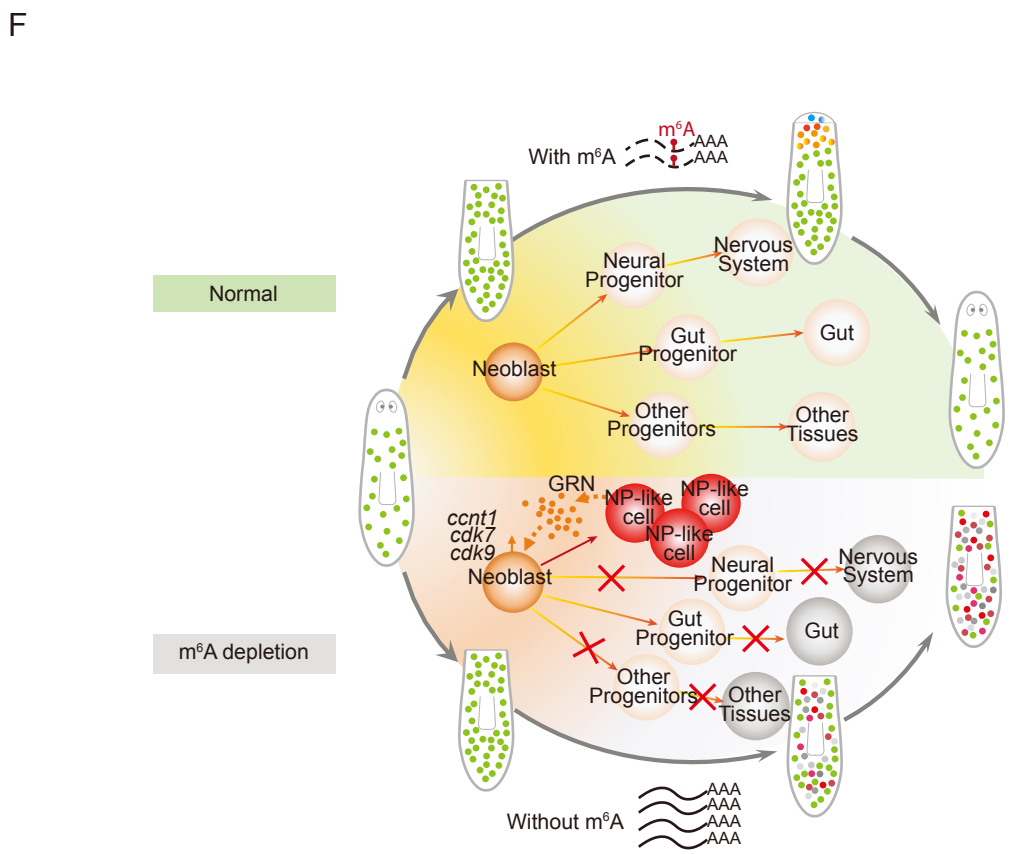

Supplement: CPR-56-e13481-s005.pdf [file CPR-56-e13481-s005.pdf]
